# Supplementary material for: Impact of Altered Body Composition on Clinical and Oncological Outcomes in Intrahepatic Cholangiocarcinoma
Source: MDPI journal article supplement (doi:10.3390/jcm12247747), 2023-12-18
Supplement: s1 [file s1]

**Supplementary Table S1** Univariate and multivariate analysis of associations between body composition and clinical features in cholangiocarcinoma.

| Outcome                                    | Desriptives       |                   | Univarite analysis |       | Multivariate Analysis      |                   |
|--------------------------------------------|-------------------|-------------------|--------------------|-------|----------------------------|-------------------|
|                                            | < 25(n=77)        | ≥25(n=85)         | OR (95% CI)        | p=    | OR (95% CI)                | p=                |
| BMI(kg/m <sup>2</sup> )                    |                   |                   |                    |       |                            |                   |
| Sex<br>(male/female(%); ref=male)          | 30(39.0)/47(61.0) | 46(54.1)/39(45.9) | 0.541(0.289-1.012) | 0.055 | 0.431(0.177-1.046)         | 0.063             |
| Age<br>(≤65/ >65 years(%); ref=≤65)        | 35(45.5)/42(54.5) | 45(52.9)/40(47.1) | 0.741(0.399-1.375) | 0.342 |                            |                   |
| ASA<br>((I/II)/(III/IV) (%);ref= I/II)     | 38(49.4)/39(50.6) | 30(35.3)/55(64.7) | 1.786(0.951-3.356) | 0.071 | 0.244(0.017-3.406)         | 0.144             |
| Cholangitis<br>(No/Yes(%);ref=No)          | 69(89.6)/8(10.4)  | 83(97.6)/2(2.4)   | 0.208(0.043-1.011) | 0.052 | 0.244(0.017-3.406)         | 0.294             |
| PVE<br>(No/Yes(%);ref=No)                  | 68(88.3)/9(11.7)  | 80(94.1)/5(5.9)   | 0.472(0.151-1.477) | 0.197 |                            |                   |
| Neoadjuvant therapy<br>((No/Yes(%);ref=No) | 66(85.7)/11(14.3) | 75(88.2)/10(11.8) | 0.800(0.319-2.003) | 0.634 |                            |                   |
| AST, U/L<br>(≤40/ >40(%); ref=≤40)         | 52(67.5)/25(32.5) | 58(68.2)/27(31.8) | 0.968(0.500-1.874) | 0.924 |                            |                   |
| ALT, U/L<br>(≤40/ >40(%); ref=≤40)         | 46(59.7)/18(23.4) | 51(60.0)/25(29.4) | 1.253(0.607-2.587) | 0.543 |                            |                   |
| Albumin,g/L<br>(≤4.2/ >4.2(%); ref=≤4.2)   | 34(44.2)/25(32.5) | 27(31.8)/43(50.6) | 2.166(1.069-4.387) | 0.032 | 2.075(0.937-4.595)         | 0.567             |
| AP,U/L<br>(≤100/ >100(%); ref=≤100)        | 20(26.0)/53(68.8) | 38(44.7)/45(52.9) | 0.447(0.228-0.875) | 0.019 | 0.598(0.249-1.437)         | 0.465             |
| CRP,mg/l<br>(≤8.2/ >8.2(%); ref=≤8.2)      | 39(50.6)/33(42.9) | 50(58.8)/31(36.5) | 1.254(0.704-2.235) | 0.344 |                            |                   |
| GGT,U/L<br>(≤100/ >100(%); ref=≤100)       | 34(44.2)/39(50.6) | 42(49.4)/41(48.2) | 0.851(0.453-1.598) | 0.616 |                            |                   |
| Hemoglobin, g/L<br>(≤13/ >13(%); ref=≤13)  | 51(66.2)/25(32.5) | 25(29.4)/59(69.4) | 4.814(2.466-9.40)  | 0.001 | <b>6.443(2.538-16.359)</b> | <b>&lt; 0.001</b> |
| INR<br>(≤1/>1(%); ref=≤1)                  | 43(55.8)/33(42.9) | 40(47.1)/43(50.6) | 1.401(0.749-2.618) | 0.291 |                            |                   |

|                                                                                |                   |                   |                    |       |                           |              |
|--------------------------------------------------------------------------------|-------------------|-------------------|--------------------|-------|---------------------------|--------------|
| Platelet count<br>(≤300/ >300(%); ref=≤300)                                    | 50(64.9)/26(33.8) | 67(78.8)/17(20.0) | 0.488(0.239-0.995) | 0.048 | 0.517(0.172-1.552)        | 0.240        |
| Prothrombin time<br>(≤110/ >110(%); ref=≤110)                                  | 56(72.7)/20(26.0) | 73(85.9)/10(11.8) | 0.384(0.166-0.884) | 0.025 | <b>0.229(0.072-0.733)</b> | <b>0.013</b> |
| Total bilirubin,mg/dl<br>(≤1/ >1(%); ref=≤1)                                   | 62(80.5)/14(18.2) | 76(89.4)/8(9.4)   | 0.466(0.184-1.183) | 0.108 |                           |              |
| Intraop PRBC<br>(No/Yes(%);ref=No)                                             | 49(63.6)/28(36.4) | 65(76.5)/20(23.5) | 0.538(0.272-1.066) | 0.076 | 1.479(0.396-5.525)        | 0.561        |
| Intraop FFP<br>((No/Yes(%);ref=No)                                             | 50(64.9)/27(35.1) | 56(65.9)/29(34.1) | 0.959(0.502-1.834) | 0.899 |                           |              |
| Operative time,minutes<br>(≤360/ >360(%); ref=≤360)                            | 57(74.0)/20(26.0) | 58(68.2)/27(31.8) | 1.327(0.669-2.630) | 0.418 |                           |              |
| Time to surgery,days<br>(≤30/ >30(%); ref=≤30)                                 | 17(22.1)/52(67.5) | 20(23.5)/57(67.1) | 0.932(0.441-1.968) | 0.853 |                           |              |
| LVI<br>(No/Yes(%);ref=No)                                                      | 60(77.9)/13(16.9) | 59(69.4)/20(23.5) | 1.565(0.713-3.431) | 0.264 |                           |              |
| MVI<br>(No/Yes(%);ref=No)                                                      | 45(58.4)/28(36.4) | 58(68.2)/24(28.2) | 0.655(0.340-1.300) | 0.233 |                           |              |
| R1 resection<br>((R0/R2)/R1) (%); ref=R0/R2)                                   | 66(85.7)/11(14.3) | 79(92.9)/5(5.9)   | 0.380(0.126-1.148) | 0.086 | 0.477(0.095-2.400)        | 0.369        |
| pT category<br>(T1-2/T3-4(%);ref=T1-T2)                                        | 50(64.9)/26(33.8) | 70(82.4)/15(17.6) | 0.412(0.198-0.857) | 0.018 | <b>0.296(0.101-0.864)</b> | <b>0.026</b> |
| pN category<br>(N0/N1(%);ref=N0)                                               | 42(54.5)/30(39.0) | 49(57.6)/27(31.8) | 0.771(0.397-1.498) | 0.443 |                           |              |
| Tumor grading<br>((G1/G2)/( G3/G4) (%);ref= G1/G2)                             | 43(55.8)/25(32.5) | 52(61.2)/23(27.1) | 0.761(0.379-1.525) | 0.441 |                           |              |
| ICU time,days<br>(≤1/>1(%),ref=1)                                              | 59(76.6)/18(23.4) | 68(80.0)/17(20.0) | 0.819(0.387-1.733) | 0.602 |                           |              |
| Hospitalization,days<br>(≤14/>14(%); ref=≤14)                                  | 32(41.6)/45(58.4) | 55(64.7)/30(35.3) | 0.388(0.206-0.732) | 0.003 | 0.925(0.274-3.122)        | 0.900        |
| Postoperative complications Clavien-Dindo((0/I/II)/(III/IV/V) (%);ref= 0/I/II) | 57(74.0)/20(26.0) | 71(83.5)/14(16.5) | 0.409(0.216-0.775) | 0.006 | 0.663(0.145-3.037)        | 0.596        |

|                                                                 |                   |                   |                    |         |                           |                   |
|-----------------------------------------------------------------|-------------------|-------------------|--------------------|---------|---------------------------|-------------------|
| Liver failure<br>(No/Yes(%);ref=No)                             | 58(75.3)/19(24.7) | 76(89.4)/9(10.6)  | 0.361(0.152-0.857) | 0.021   | 0.548(0.158-1.893)        | 0.341             |
| Bile leak, (No/Yes(%);ref=No)                                   | 56(72.7)/21(27.3) | 77(90.6)/8(9.4)   | 0.277(0.114-0.671) | 0.004   | 0.426(0.123-1.467)        | 0.176             |
| Hemorrhage, (No/Yes(%);ref=No)                                  | 70(90.9)/7(9.1)   | 79(92.9)/6(7.1)   | 0.759(0.244-2.367) | 0.635   |                           |                   |
| Infection Clavien-Dindo((0/I/II)/(III/IV/V)<br>(%);ref= 0/I/II) | 66(85.7)/10(13.0) | 82(96.5)/3(3.5)   | 0.421(0.205-0.863) | 0.018   | 0.896(0.754-14.397)       | 0.113             |
| Adjuvant therapy<br>(No/Yes(%);ref=No)                          | 52(67.5)/22(28.6) | 49(57.6)/34(40.0) | 1.640(0.845-3.183) | 0.144   |                           |                   |
| Sarcopenia                                                      | No(n=59)          | Yes(n=103)        | OR (95% CI)        | p=      | OR (95% CI)               | p=                |
| Sex<br>(male/female(%); ref=male)                               | 40(67.8)/19(32.2) | 36(35.0)/67(65.0) | 3.918(1.985-7.733) | < 0.001 | <b>2.263(0.898-5.701)</b> | <b>&lt; 0.001</b> |
| Age<br>(≤65/ >65 years(%); ref=≤65)                             | 29(49.2)/30(50.8) | 51(49.5)/52(50.5) | 0.986(0.520-1.869) | 0.965   |                           |                   |
| ASA<br>((I/II)/(III/IV) (%);ref= I/II)                          | 24(40.7)/35(59.3) | 44(42.7)/59(57.3) | 0.919(0.480-1.761) | 0.800   |                           |                   |
| Cholangitis<br>(No/Yes(%);ref=No)                               | 55(93.2)/4(6.8)   | 97(94.2)/6(5.8)   | 0.851(0.230-3.145) | 0.808   |                           |                   |
| PVE<br>(No/Yes(%);ref=No)                                       | 55(93.2)/4(6.8)   | 93(90.3)/10(9.7)  | 1.478(0.442-4.941) | 0.525   |                           |                   |
| Neoadjuvant therapy<br>((No/Yes(%);ref=No)                      | 54(91.5)/5(8.5)   | 87(84.5)/16(15.5) | 1.986(0.688-5.733) | 0.205   |                           |                   |
| AST, U/L<br>(≤40/ >40(%); ref=≤40)                              | 40(67.8)/19(32.2) | 70(68.0)/33(32.0) | 0.992(0.500-1.969) | 0.983   |                           |                   |
| ALT, U/L<br>(≤40/ >40(%); ref=≤40)                              | 33(55.9)/19(32.2) | 64(62.1)/24(23.3) | 0.651(0.313-1.357) | 0.252   |                           |                   |
| Albumin,g/L<br>(≤4.2/ >4.2(%); ref=≤4.2)                        | 21(35.6)/25(42.4) | 40(38.8)/43(41.7) | 0.903(0.438-1.860) | 0.782   |                           |                   |
| AP,U/L<br>(≤100/ >100(%); ref=≤100)                             | 20(33.9)/37(62.7) | 38(36.9)/61(57.2) | 0.868(0.440-1.710) | 0.682   |                           |                   |
| CRP,mg/l<br>(≤8.2/ >8.2(%); ref=≤8.2)                           | 32(54.2)/24(40.7) | 57(55.3)/40(38.8) | 0.892(0.461-1.724) | 0.733   |                           |                   |
| GGT,U/L                                                         | 23(39.0)/34(57.6) | 53(51.5)/46(44.7) | 0.587(0.303-1.136) | 0.114   |                           |                   |

|                                                     |                   |                   |                    |       |                           |              |
|-----------------------------------------------------|-------------------|-------------------|--------------------|-------|---------------------------|--------------|
| (≤100/ >100(%); ref=≤100)                           |                   |                   |                    |       |                           |              |
| Hemoglobin, g/L<br>(≤13/ >13(%); ref=≤13)           | 22(37.3)/36(61.0) | 54(52.4)/48(46.6) | 0.543(0.281-1.049) | 0.069 | 0.560(0.270-1.160)        | 0.119        |
| INR<br>(≤1/ >1(%); ref=≤1)                          | 29(49.2)/29(49.2) | 54(52.4)/47(45.6) | 0.870(0.456-1.661) | 0.674 |                           |              |
| Platelet count<br>(≤300/ >300(%); ref=≤300)         | 46(78.0)/12(20.3) | 71(68.9)/31(30.1) | 1.674(0.781-3.588) | 0.186 |                           |              |
| Prothrombin time<br>(≤110/ >110(%); ref=≤110)       | 46(78.0)/12(20.3) | 83(80.6)/18(17.5) | 0.831(0.368-1.877) | 0.657 |                           |              |
| Total bilirubin,mg/dl<br>(≤1/ >1(%); ref=≤1)        | 51(86.4)/7(11.9)  | 87(84.5)/15(14.6) | 1.256(0.480-3.285) | 0.642 |                           |              |
| Intraop PRBC<br>(No/Yes(%);ref=No)                  | 45(76.3)/14(23.7) | 69(67.0)/34(33.0) | 1.584(0.766-3.277) | 0.215 |                           |              |
| Intraop FFP<br>((No/Yes(%);ref=No)                  | 38(64.4)/21(35.6) | 68(66.0)/35(34.0) | 0.931(0.476-1.822) | 0.835 |                           |              |
| Operative time minutes<br>(≤360/ >360(%); ref=≤360) | 42(71.2)/17(28.8) | 73(70.9)/30(29.1) | 1.015(0.501-2.056) | 0.966 |                           |              |
| Time to surgery,days<br>(≤30/ >30(%); ref=≤30)      | 16(27.1)/36(61.0) | 21(20.4)/73(70.9) | 1.545(0.720-3.314) | 0.264 |                           |              |
| LVI<br>(No/Yes(%);ref=No)                           | 49(83.1)/8(13.6)  | 70(68.0)/25(24.3) | 2.187(0.911-5.252) | 0.080 | <b>2.307(0.906-5.874)</b> | <b>0.080</b> |
| MVI<br>(No/Yes(%);ref=No)                           | 37(62.7)/19(32.2) | 66(64.1)/33(32.0) | 0.938(0.682-1.290) | 0.692 |                           |              |
| R1 resection<br>((R0/R2)/R1) (%); ref=R0/R2)        | 51(86.4)/7(11.9)  | 94(91.3)/9(8.7)   | 0.698(0.245-1.983) | 0.499 |                           |              |
| pT category<br>(T1-2/T3-4(%);ref=T1-T2)             | 39(66.1)/19(32.2) | 81(78.6)/22(21.4) | 0.558(0.271-1.149) | 0.113 |                           |              |
| pN category<br>(N0/N1(%);ref=N0)                    | 35(59.3)/16(27.1) | 56(54.4)/41(39.8) | 1.602(0.783-3.276) | 0.197 |                           |              |
| Tumor grading<br>((G1/G2)/( G3/G4) (%);ref= G1/G2)  | 35(59.3)/19(32.2) | 60(58.3)/29(28.2) | 0.890(0.436-1.816) | 0.750 |                           |              |
| ICU time,days                                       | 50(84.7)/9(15.3)  | 77(74.8)/26(25.2) | 1.876(0.812-4.334) | 0.141 |                           |              |

|                                                                                |                   |                   |                    |         |                            |              |
|--------------------------------------------------------------------------------|-------------------|-------------------|--------------------|---------|----------------------------|--------------|
| (≤1/>1(%),ref=1)                                                               |                   |                   |                    |         |                            |              |
| Hospitalization,days<br>(≤14/>14(%); ref=≤14)                                  | 35(59.3)/24(40.7) | 52(50.5)/51(49.5) | 1.430(0.749-2.732) | 0.279   |                            |              |
| Postoperative complications Clavien-Dindo((0/I/II (%))/(III/IV/V);ref= 0/I/II) | 47(79.7)/12(20.3) | 81(78.6)/22(21.4) | 0.874(0.458-1.669) | 0.683   |                            |              |
| Liver failure<br>(No/Yes(%);ref=No)                                            | 47(79.7)/12(20.3) | 87(84.5)/16(15.5) | 0.720(0.315-1.649) | 0.438   |                            |              |
| Bile leak<br>(No/Yes(%);ref=No)                                                | 46(78.0)/13(22.0) | 87(84.5)/16(15.5) | 0.651(0.288-1.469) | 0.301   |                            |              |
| Hemorrhage<br>(No/Yes(%);ref=No)                                               | 55(93.2)/4(6.8)   | 94(91.3)/9(8.7)   | 1.316(0.387-4.477) | 0.660   |                            |              |
| Infection Clavien-Dindo<br>((0/I/II)/(III/IV/V) (%);ref= 0/I/II)               | 54(91.5)/5(8.5)   | 94(91.3)/8(7.8)   | 0.740(0.362-1.511) | 0.408   |                            |              |
| Adjuvant therapy<br>(No/Yes(%);ref=No)                                         | 39(66.1)/18(30.5) | 62(60.2)/38(36.9) | 1.328(0.667-2.645) | 0.420   |                            |              |
| Myosteatosi                                                                    | No(n=76)          | Yes(n=86)         | OR (95% CI)        | p=      | OR (95% CI)                | p=           |
| Sex<br>(male/female(%); ref=male)                                              | 43(56.6)/33(43.4) | 33(38.4)/53(61.6) | 2.093(1.117-3.922) | 0.021   | <b>3.636(1.447-9.132)</b>  | <b>0.006</b> |
| Age<br>(≤65/ >65 years(%); ref=≤65)                                            | 50(65.8)/26(34.2) | 30(34.9)/56(65.1) | 3.590(1.876-6.870) | < 0.001 | <b>4.989(1.904-13.068)</b> | <b>0.001</b> |
| ASA<br>((I/II)/(III/IV) (%);ref= I/II)                                         | 30(39.5)/46(60.5) | 38(44.2)/48(55.8) | 0.824(0.440-1.542) | 0.544   |                            |              |
| Cholangitis<br>(No/Yes(%);ref=No)                                              | 72(94.7)/4(5.3)   | 80(93.0)/6(7.0)   | 1.350(0.366-4.976) | 0.652   |                            |              |
| PVE<br>(No/Yes(%);ref=No)                                                      | 71(93.4)/5(6.6)   | 77(89.5)/9(10.5)  | 1.660(0.531-5.189) | 0.384   |                            |              |
| Neoadjuvant therapy<br>((No/Yes(%);ref=No)                                     | 67(88.2)/9(11.8)  | 74(86.0)/12(14.0) | 1.207(0.479-3.045) | 0.690   |                            |              |
| AST, U/L<br>(≤40/ >40(%); ref=≤40)                                             | 51(67.1)/25(32.9) | 59(68.6)/27(31.4) | 0.934(0.482-1.807) | 0.838   |                            |              |
| ALT, U/L<br>(≤40/ >40(%); ref=≤40)                                             | 51(67.1)/25(32.9) | 59(68.6)/27(31.4) | 0.722(0.351-1.484) | 0.375   |                            |              |

|                                                     |                   |                   |                    |       |                           |              |
|-----------------------------------------------------|-------------------|-------------------|--------------------|-------|---------------------------|--------------|
| Albumin,g/L<br>(≤4.2/ >4.2(%); ref=≤4.2)            | 22(28.9)/40(52.6) | 39(45.3)/28(32.6) | 0.395(0.194-804)   | 0.010 | 0.817(0.318-2.096)        | 0.674        |
| AP,U/L<br>(≤100/ >100(%); ref=≤100)                 | 27(35.5)/48(63.2) | 31(36.0)/50(58.1) | 0.907(0.473-1.739) | 0.769 |                           |              |
| CRP,mg/l<br>(≤8.2/ >8.2(%); ref=≤8.2)               | 48(63.2)/25(32.9) | 41(47.7)/39(45.3) | 1.677(0.882-3.187) | 0.115 |                           |              |
| GGT,U/L<br>(≤100/ >100(%); ref=≤100)                | 35(46.1)/40(52.6) | 41(47.7)/40(46.5) | 0.854(0.455-1.601) | 0.622 |                           |              |
| Hemoglobin, g/L<br>(≤13/ >13(%); ref=≤13)           | 25(32.9)/50(65.8) | 51(59.3)/34(39.5) | 0.333(0.175-0.637) | 0.001 | 0.535(0.230-1.242)        | 0.145        |
| INR<br>(≤1/>1(%); ref=≤1)                           | 39(51.3)/35(46.1) | 44(51.2)/41(47.7) | 1.038(0.556-1.938) | 0.906 |                           |              |
| Platelet count<br>(≤300/ >300(%); ref=≤300)         | 54(71.1)/21(27.6) | 63(73.3)/22(25.6) | 0.898(0.446-1.808) | 0.763 |                           |              |
| Prothrombin time<br>(≤110/ >110(%); ref=≤110)       | 59(77.6)/15(19.7) | 70(81.4)/15(17.4) | 0.843(0.381-1.867) | 0.673 |                           |              |
| Total bilirubin,mg/dl<br>(≤1/ >1(%); ref=≤1)        | 69(90.8)/6(7.9)   | 69(80.2)/16(18.6) | 2.667(0.985-7.219) | 0.054 | 2.141(0.637-7.196)        | 0.218        |
| Intraop PRBC<br>(No/Yes(%);ref=No)                  | 62(81.6)/14(18.4) | 52(60.5)/34(39.5) | 2.896(1.405-5.969) | 0.004 | 1.594(0.594-4.277)        | 0.354        |
| Intraop FFP<br>((No/Yes(%);ref=No)                  | 54(71.1)/22(28.9) | 52(60.5)/34(39.5) | 1.605(0.831-3.098) | 0.159 |                           |              |
| Operative time minutes<br>(≤360/ >360(%); ref=≤360) | 55(72.4)/21(27.6) | 60(69.8)/26(30.2) | 1.135(0.574-2.244) | 0.716 |                           |              |
| Time to surgery,days<br>(≤30/ >30(%); ref=≤30)      | 18(23.7)/46(60.5) | 19(22.1)/63(73.3) | 1.297(0.614-2.742) | 0.495 |                           |              |
| LVI<br>(No/Yes(%);ref=No)                           | 60(78.9)/10(13.2) | 59(68.6)/23(26.7) | 2.339(1.025-5.336) | 0.043 | <b>2.942(1.047-8.268)</b> | <b>0.041</b> |
| MVI<br>(No/Yes(%);ref=No)                           | 49(64.5)/23(30.3) | 54(62.8)/29(33.7) | 0.957(0.819-1.119) | 0.585 |                           |              |
| R1 resection<br>((R0/R2)/R1) (%); ref=R0/R2)        | 69(90.8)/6(7.9)   | 76(88.4)/10(11.6) | 1.513(0.523-4.382) | 0.445 |                           |              |

|                                                                                    |                   |                   |                    |         |                           |                   |
|------------------------------------------------------------------------------------|-------------------|-------------------|--------------------|---------|---------------------------|-------------------|
| pT category<br>(T1-2/T3-4(%);ref=T1-T2)                                            | 55(72.4)/20(26.3) | 65(75.6)/21(24.4) | 0.888(0.437-1.807) | 0.744   |                           |                   |
| pN category<br>(N0/N1(%);ref=N0)                                                   | 47(61.8)/25(32.9) | 44(51.2)/32(37.2) | 1.367(0.703-2.660) | 0.357   |                           |                   |
| Tumor grading<br>((G1/G2)/( G3/G4) (%);ref= G1/G2)                                 | 45(59.2)/22(28.9) | 50(58.1)/26(30.2) | 1.064(0.530-2.134) | 0.862   |                           |                   |
| ICU time,days<br>(≤1/>1(%),ref=1)                                                  | 62(81.6)/14(18.4) | 65(75.6)/21(24.4) | 1.431(0.669-3.061) | 0.356   |                           |                   |
| Hospitalization,days<br>(≤14/>14(%); ref=≤14)                                      | 45(59.2)/59(56.2) | 38(38.4)/61(61.6) | 1.521(0.816-2.835) | 0.187   |                           |                   |
| Postoperative complications Clavien-Dindo<br>((0/I/II)/(III/IV/V) (%);ref= 0/I/II) | 47(61.8)/29(38.2) | 47(54.7)/39(45.3) | 1.345(0.718-2.520) | 0.355   |                           |                   |
| Liver failure<br>(No/Yes(%);ref=No)                                                | 66(86.8)/10(13.2) | 68(79.1)/18(20.9) | 1.747(0.751-4.063) | 0.195   |                           |                   |
| Bile leak<br>(No/Yes(%);ref=No)                                                    | 62(81.6)/14(18.4) | 71(82.6)/15(17.4) | 0.936(0.419-2.091) | 0.871   |                           |                   |
| Hemorrhage<br>(No/Yes(%);ref=No)                                                   | 72(94.7)/4(5.3)   | 77(89.5)/9(10.5)  | 2.104(0.621-7.132) | 0.232   |                           |                   |
| Infection Clavien-Dindo<br>((0/I/II)/(III/IV/V) (%);ref= 0/I/II)                   | 72(94.7)/3(3.9)   | 76(88.4)/10(11.6) | 1.004(0.499-2.022) | 0.991   |                           |                   |
| Adjuvant therapy<br>(No/Yes(%);ref=No)                                             | 39(51.3)/33(43.4) | 62(72.1)/23(26.7) | 0.438(0.225-0.854) | 0.015   | 0.485(0.205-1.146)        | 0.099             |
| VFA(cm <sup>2</sup> )                                                              | < 100(n=61)       | ≥100(n=101)       | OR (95% CI)        | p=      | OR (95% CI)               | p=                |
| Sex<br>(male/female(%); ref=male)                                                  | 13(21.3)/48(78.7) | 63(62.4)/38(37.6) | 0.163(0.078-0.340) | < 0.001 | <b>0.247(0.114-0.536)</b> | <b>&lt; 0.001</b> |
| Age<br>(≤65/ >65 years(%); ref=≤65)                                                | 39(63.9)/22(36.1) | 41(40.6)/60(59.4) | 2.594(1.346-5.001) | 0.004   | <b>3.577(1.592-8.035)</b> | <b>0.002</b>      |
| ASA<br>((I/II)/(III/IV) (%);ref= I/II)                                             | 27(44.3)/34(55.7) | 41(40.6)/60(59.4) | 1.162(0.611-2.210) | 0.647   |                           |                   |
| Cholangitis<br>(No/Yes(%);ref=No)                                                  | 56(91.8)/5(8.2)   | 96(95.0)/5(5.0)   | 0.583(0.162-2.104) | 0.410   |                           |                   |

|                                                     |                   |                   |                     |       |                           |              |
|-----------------------------------------------------|-------------------|-------------------|---------------------|-------|---------------------------|--------------|
| PVE<br>(No/Yes(%);ref=No)                           | 57(93.4)/4(6.6)   | 91(90.1)/10(9.9)  | 1.566(0.469-5.230)  | 0.466 |                           |              |
| Neoadjuvant therapy<br>((No/Yes(%);ref=No)          | 54(88.5)/7(11.5)  | 87(86.1)/14(13.9) | 1.241(0.471-3.271)  | 0.662 |                           |              |
| AST, U/L<br>(≤40/ >40(%); ref=≤40)                  | 39(63.9)/22(36.1) | 71(70.3)/30(29.7) | 0.749(0.381-1.471)  | 0.401 |                           |              |
| ALT, U/L<br>(≤40/ >40(%); ref=≤40)                  | 35(57.4)/16(26.2) | 62(61.4)/27(26.7) | 0.953(0.453-2.005)  | 0.898 |                           |              |
| Albumin,g/L<br>(≤4.2/ >4.2(%); ref=≤4.2)            | 24(39.3)/25(41.0) | 37(36.3)/43(42.2) | 1.116(0.547-2.274)  | 0.763 |                           |              |
| AP,U/L<br>(≤100/ >100(%); ref=≤100)                 | 17(27.9)/40(65.6) | 41(40.6)/58(57.4) | 0.601(0.300-1.204)  | 0.151 |                           |              |
| CRP,mg/l<br>(≤8.2/ >8.2(%); ref=≤10)                | 30(49.2)/26(42.6) | 52(51.5)/45(44.6) | 0.999(0.516-1.931)  | 0.996 |                           |              |
| GGT,U/L(<br>≤100/ >100(%); ref=≤100)                | 28(45.9)/29(47.5) | 48(47.5)/51(50.5) | 1.026(0.535-1.969)  | 0.939 |                           |              |
| Hemoglobin, g/L<br>(≤13/ >13(%); ref=≤13)           | 37(60.7)/22(36.1) | 39(38.6)/62(61.4) | 2.674 (1.378-5.186) | 0.004 | <b>3.265(1.455-7.325)</b> | <b>0.004</b> |
| INR<br>(≤1/>1(%); ref=≤1)                           | 36(59.0)/23(37.7) | 47(46.5)/53(52.5) | 1.765(0.918-3.395)  | 0.089 | 1.310(0.603-2.844)        | 0.495        |
| Platelet count<br>(≤300/ >300(%); ref=≤300)         | 40(65.6)/19(31.1) | 77(76.2)/24(23.8) | 0.656(0.322-1.338)  | 0.247 |                           |              |
| Prothrombin time<br>(≤110/ >110(%); ref=≤110)       | 44(72.1)/15(24.6) | 85(84.2)/15(14.9) | 0.518(0.232-1.155)  | 0.108 |                           |              |
| Total bilirubin,mg/dl<br>(≤1/ >1(%); ref=≤1)        | 49(80.3)/10(16.4) | 89(88.1)/12(11.9) | 0.661(0.266-1.639)  | 0.371 |                           |              |
| Intraop PRBC<br>(No/Yes(%);ref=No)                  | 39(63.9)/22(36.1) | 75(74.3)/26(25.7) | 0.615(0.309-1.222)  | 0.165 |                           |              |
| Intraop FFP<br>((No/Yes(%);ref=No)                  | 39(63.9)/22(36.1) | 67(66.3)/34(33.7) | 0.900(0.462-1.751)  | 0.755 |                           |              |
| Operative time minutes<br>(≤360/ >360(%); ref=≤360) | 44(72.1)/17(27.9) | 71(70.3)/30(29.7) | 1.094(0.541-2.211)  | 0.803 |                           |              |



|                                                                                    |                   |                   |                    |       |                    |       |
|------------------------------------------------------------------------------------|-------------------|-------------------|--------------------|-------|--------------------|-------|
| Time to surgery,days<br>(≤30/ >30(%); ref=≤30)                                     | 17(27.9)/38(62.3) | 20(19.8)/71(70.3) | 1.588(0.745-3.386) | 0.231 |                    |       |
| LVI<br>(No/Yes(%);ref=No)                                                          | 45(73.8)/11(18.0) | 74(73.3)/22(21.8) | 1.216(0.539-2.742) | 0.637 |                    |       |
| MVI<br>(No/Yes(%);ref=No)                                                          | 34(55.7)/24(39.3) | 69(68.3)/28(27.7) | 0.575(0.290-1.138) | 0.112 |                    |       |
| R1 resection<br>((R0/Rx)/R1) (%); ref=R0/Rx)                                       | 46(75.4)/15(24.6) | 87(86.1)/13(12.9) | 0.458(0.201-1.045) | 0.063 |                    |       |
| pT category<br>(T1-2/T3-4(%);ref=T1-T2)                                            | 45(73.8)/15(24.6) | 75(74.3)/26(25.7) | 1.040(0.499-2.169) | 0.917 |                    |       |
| pN category<br>(N0/N1(%);ref=N0)                                                   | 37(60.7)/18(29.5) | 54(53.5)/39(38.6) | 1.485(0.739-2.983) | 0.267 |                    |       |
| Tumor grading<br>((G1/G2)/( G3/G4) (%);ref= G1/G2)                                 | 40(65.6)/14(23.0) | 55(54.5)/34(33.7) | 1.766(0.839-3.716) | 0.134 |                    |       |
| ICU time,days<br>(≤1/>1(%),ref=1)                                                  | 49(80.3)/12(19.7) | 78(77.2)/23(22.8) | 1.204(0.550-2.637) | 0.643 |                    |       |
| Hospitalization,days<br>(≤14/>14(%); ref=≤14)                                      | 26(42.6)/35(57.4) | 61(60.4)/40(39.6) | 0.487(0.255-0.929) | 0.029 | 0.570(0.260-1.251) | 0.161 |
| Postoperative complications Clavien-Dindo<br>((0/I/II)/(III/IV/V) (%);ref= 0/I/II) | 45(73.8)/16(26.2) | 63(62.4)/38(37.6) | 0.614(0.323-1.167) | 0.136 |                    |       |
| Liver failure<br>(No/Yes(%);ref=No)                                                | 47(77.0)/14(23.0) | 87(86.1)/14(13.9) | 0.540(0.238-1.228) | 0.142 |                    |       |
| Bile leak<br>(No/Yes(%);ref=No)                                                    | 46(75.4)/15(24.6) | 87(86.1)/14(13.9) | 0.493(0.219-1.111) | 0.088 | 0.636(0.229-1.765) | 0.385 |
| Hemorrhage<br>(No/Yes(%);ref=No)                                                   | 55(90.2)/6(9.8)   | 94(93.1)/7(6.9)   | 0.683(0.218-2.135) | 0.512 |                    |       |
| Infection Clavien-Dindo<br>((0/I/II)/(III/IV/V) (%);ref= 0/I/II)                   | 42(68.9)/18(29.5) | 76(75.2)/25(24.8) | 0.758(0.371-1.546) | 0.445 |                    |       |
| Adjuvant therapy<br>(No/Yes(%);ref=No)                                             | 39(63.9)/21(34.4) | 63(61.8)/35(34.3) | 1.048(0.535-2.055) | 0.891 |                    |       |
| Sarcoprnic_obesity                                                                 | No(n=137)         | Yes(n=25)         | OR (95% CI)        | p=    | OR (95% CI)        | p=    |

|                                               |                    |                   |                    |         |                            |              |
|-----------------------------------------------|--------------------|-------------------|--------------------|---------|----------------------------|--------------|
| Sex<br>(male/female(%); ref=male)             | 55(40.1)/82(59.9)  | 21(84.0)/4(16.0)  | 0.128(0.042-0.393) | < 0.001 | <b>0.180(0.056-0.582)</b>  | <b>0.004</b> |
| Age<br>(≤65/ >65 years(%); ref=≤65)           | 74(54.0)/63(46.0)  | 6(24.0)/19(76.0)  | 3.720(1.400-9.885) | 0.008   | <b>4.007(1.375-11.674)</b> | <b>0.011</b> |
| ASA<br>((I/II)/(III/IV) (%);ref= I/II)        | 60(43.8)/77(56.2)  | 8(32.0)/17(68.0)  | 1.656(0.669-4.095) | 0.275   |                            |              |
| Cholangitis<br>(No/Yes(%);ref=No)             | 127(92.7)/10(7.3)  | 0(0)/25(100.0)    | 0(0-0)             | 0.999   |                            |              |
| PVE<br>(No/Yes(%);ref=No)                     | 125(91.2)/12(8.8)  | 23(92.0)/2(8.0)   | 0.906(0.190-4.317) | 0.901   |                            |              |
| Neoadjuvant therapy<br>((No/Yes(%);ref=No)    | 120(87.6)/17(12.4) | 21(84.0)/4(16.0)  | 1.345(0.412-4.392) | 0.624   |                            |              |
| AST, U/L<br>(≤40/ >40(%); ref=≤40)            | 90(65.7)/47(34.3)  | 20(80.0)/5(20.0)  | 0.479(0.169-1.356) | 0.166   |                            |              |
| ALT, U/L<br>(≤40/ >40(%); ref=≤40)            | 82(59.9)/37(27.0)  | 15(60.0)/6(24.0)  | 0.886(0.319-2.466) | 0.817   |                            |              |
| Albumin,g/L<br>(≤4.2/ >4.2(%); ref=≤4.2)      | 53(38.7)/53(38.7)  | 8(32.0)/15(60.0)  | 1.875(0.733-4.794) | 0.189   |                            |              |
| AP,U/L<br>(≤100/ >100(%); ref=≤100)           | 45(32.8)/86(62.8)  | 13(52.0)/12(48.0) | 0.483(0.204-1.145) | 0.099   | 1.009(0.292-3.479)         | 0.989        |
| CRP,mg/l<br>(≤8.2/ >8.2(%); ref=≤8.2)         | 71(51.8)/57(41.6)  | 18(72.0)/7(28.0)  | 0.599(0.247-1.454) | 0.257   |                            |              |
| GGT,U/L<br>(≤100/ >100(%); ref=≤100)          | 59(43.1)/72(52.6)  | 17(68.0)/8(32.0)  | 0.386(0.156-0.956) | 0.040   | 0.405(0.134-1.225)         | 0.110        |
| Hemoglobin, g/L<br>(≤13/ >13(%); ref=≤13)     | 67(48.9)/68(49.6)  | 9(36.0)/14(64.0)  | 1.752(0.724-4.238) | 0.214   |                            |              |
| INR<br>(≤1/>1(%); ref=≤1)                     | 75(54.7)/60(43.8)  | 8(32.0)/16(64.0)  | 2.500(1.002-6.236) | 0.049   | 1.247(0.419-3.714)         | 0.691        |
| Platelet count<br>(≤300/ >300(%); ref=≤300)   | 95(69.3)/40(29.2)  | 22(88.0)/3(12.0)  | 0.324(0.092-1.144) | 0.080   | 0.779(0.184-3.299)         | 0.735        |
| Prothrombin time<br>(≤110/ >110(%); ref=≤110) | 107(78.1)/28(20.4) | 22(88.0)/2(8.0)   | 0.347(0.077-1.567) | 0.169   |                            |              |

|                                                                                    |                    |                  |                    |       |                           |              |
|------------------------------------------------------------------------------------|--------------------|------------------|--------------------|-------|---------------------------|--------------|
| Total bilirubin,mg/dl<br>(≤1/ >1(%); ref=≤1)                                       | 116(84.7)/19(13.9) | 22(88.0)/3(12.0) | 0.833(0.229-3.055) | 0.782 |                           |              |
| Intraop PRBC<br>(No/Yes(%);ref=No)                                                 | 95(69.3)/42(30.7)  | 19(76.0)/6(24.0) | 0.714(0.266-1.917) | 0.504 |                           |              |
| Intraop FFP<br>((No/Yes(%);ref=No)                                                 | 88(64.2)/49(35.8)  | 18(72.0)/7(28.0) | 0.698(0.273-1.789) | 0.454 |                           |              |
| Operative time minutes<br>(≤360/ >360(%); ref=≤360)                                | 94(68.6)/43(31.4)  | 21(84.0)/4(16.0) | 0.416(0.135-1.287) | 0.128 |                           |              |
| Time to surgery,days<br>(≤30/ >30(%); ref=≤30)                                     | 33(24.1)/90(65.7)  | 4(16.0)/19(76.0) | 1.742(0.552-5.498) | 0.344 |                           |              |
| LVI<br>(No/Yes(%);ref=No)                                                          | 103(75.2)/25(18.2) | 16(64.0)/8(32.0) | 2.060(0.793-5.351) | 0.138 |                           |              |
| MVI<br>(No/Yes(%);ref=No)                                                          | 82(59.9)/48(35.0)  | 21(84.0)/4(16.0) | 0.325(0.105-1.004) | 0.051 | 0.438(0.128-1.498)        | 0.188        |
| R1 resection<br>((R0/R2)/R1) (%); ref=R0/R2)                                       | 121(88.3)/15(10.9) | 21(96.0)/1(4.0)  | 0.336(0.042-2.666) | 0.302 |                           |              |
| pT category<br>(T1-2/T3-4(%);ref=T1-T2)                                            | 99(72.3)/37(27.0)  | 21(84.0)/4(16.0) | 0.510(0.164-1.584) | 0.244 |                           |              |
| pN category<br>(N0/N1(%);ref=N0)                                                   | 75(54.7)/51(37.2)  | 16(64.0)/6(24.0) | 0.551(0.202-1.504) | 0.245 |                           |              |
| Tumor grading<br>((G1/G2)/( G3/G4) (%);ref= G1/G2)                                 | 79(57.7)/43(31.4)  | 16(64.0)/5(20.0) | 0.574(0.197-1.675) | 0.310 |                           |              |
| ICU time,days<br>(≤1/>1(%),ref=1)                                                  | 108(78.8)/29(21.2) | 19(76.0)/6(24.0) | 1.176(0.430-3.214) | 0.752 |                           |              |
| Hospitalization,days<br>(≤14/>14(%); ref=≤14)                                      | 69(50.4)/68(49.6)  | 18(72.0)/7(28.0) | 0.395(0.155-1.005) | 0.051 | 2.382(0.453-12.525)       | 0.306        |
| Postoperative complications Clavien-Dindo<br>((0/I/II)/(III/IV/V) (%);ref= 0/I/II) | 74(54.0)/63(46.0)  | 20(80.0)/5(20.0) | 0.294(0.104-0.827) | 0.020 | <b>0.246(0.080-0.760)</b> | <b>0.015</b> |
| Liver failure<br>(No/Yes(%);ref=No)                                                | 111(81.0)/26(19.0) | 23(92.0)/2(8.0)  | 0.371(0.082-1.675) | 0.197 |                           |              |
| Bile leak                                                                          | 109(79.6)/28(20.4) | 24(96.0)/1(4.0)  | 0.162(0.021-1.251) | 0.081 | 0.363(0.036-3.718)        | 0.394        |

|                                                                  |                   |                    |                    |       |                    |       |
|------------------------------------------------------------------|-------------------|--------------------|--------------------|-------|--------------------|-------|
| (No/Yes(%);ref=No)                                               |                   |                    |                    |       |                    |       |
| Hemorrhage<br>(No/Yes(%);ref=No)                                 | 124(90.5)/13(9.5) | 130(81.3)/30(18.8) | 0(0-0)             | 0.999 |                    |       |
| Infection Clavien-Dindo<br>((0/I/II)/(III/IV/V) (%);ref= 0/I/II) | 96(70.1)/40(29.2) | 22(88.0)/3(12.0)   | 0.327(0.093-1.155) | 0.083 | 0.894(0.096-8.339) | 0.921 |
| Adjuvant therapy<br>(No/Yes(%);ref=No)                           | 83(60.6)/49(35.8) | 18(72.0)/7(28.0)   | 0.659(0.257-1.689) | 0.385 |                    |       |

Multiple Variables were associated with altered body composition in intrahepatic cholangiocarcinoma. Variables displaying a p value < 0.05 in the univariate analysis were transferred into a multivariable Logistic regression model.

Abbreviations: ALT, alanine aminotransferase; AP, Alkaline phosphatase; ASA, American Society of Anesthesiologists; AST, aspartate aminotransferase; BMI, body mass index; CRP, C--reactive protein; F, female; FFP, Fresh frozen plasma; GGT, gamma-glutamyl transferase; HR, hazard ratio; iCCA, intrahepatic cholangiocarcinoma; ICU, intensive care unit; INR, international normalized ratio; LVI, lymph vascular invasion; M, male; MVI, microvascular invasion; PRBC, Packed Red Blood Cells;PVE, portal vein embolization; RFS, Recurrence free survival.
